# Supplementary material for: What kind of neutral halogen bonds can be modulated by solvent effects?
Source: Royal Society of Chemistry journal article supplement (doi:10.1039/c8cp05358h), 2018-01-01
Supplement: c8cp05358h1.pdf [file c8cp05358h1.pdf]

**What kind of neutral halogen bonds can be modulated by solvent effects?**

Dan Shen, Peifeng Su,\* Wei Wu

The State Key Laboratory of Physical Chemistry of Solid Surfaces, Fujian Provincial Key Laboratory of Theoretical and Computational Chemistry, and College of Chemistry and Chemical Engineering, Xiamen University, Xiamen, Fujian 361005, China

Correspondence authors: \* P. Su.: [supi@xmu.edu.cn](mailto:supi@xmu.edu.cn)

Table S1. The differences of electron density, its Laplacian and the  $|V/G|$  values by  $\omega$ B97X-D/ACCD.

|                                      | $\epsilon=1$ |                   |         | $\epsilon=2.27$ |                   |         | $\epsilon=4.18$ |                   |         | $\epsilon=7.22$ |                   |         | $\epsilon=78.36$ |                   |         |
|--------------------------------------|--------------|-------------------|---------|-----------------|-------------------|---------|-----------------|-------------------|---------|-----------------|-------------------|---------|------------------|-------------------|---------|
|                                      | $\rho$       | $\nabla_{\rho}^2$ | $ V/G $ | $\rho$          | $\nabla_{\rho}^2$ | $ V/G $ | $\rho$          | $\nabla_{\rho}^2$ | $ V/G $ | $\rho$          | $\nabla_{\rho}^2$ | $ V/G $ | $\rho$           | $\nabla_{\rho}^2$ | $ V/G $ |
| BrF...pyridine                       | 0.067        | 0.149             | 1.232   | 0.083           | 0.149             | 1.367   | 0.092           | 0.146             | 1.437   | 0.097           | 0.143             | 1.481   | 0.105            | 0.136             | 1.536   |
| ClF...pyridine                       | 0.072        | 0.166             | 1.200   | 0.106           | 0.141             | 1.502   | 0.124           | 0.106             | 1.666   | 0.137           | 0.072             | 1.791   | 0.153            | 0.020             | 1.944   |
| I <sub>2</sub> ...pyridine           | 0.038        | 0.091             | 1.087   | 0.045           | 0.102             | 1.150   | 0.050           | 0.108             | 1.186   | 0.053           | 0.112             | 1.211   | 0.057            | 0.116             | 1.245   |
| Br <sub>2</sub> ...pyridine          | 0.041        | 0.112             | 1.014   | 0.054           | 0.129             | 1.119   | 0.072           | 0.141             | 1.274   | 0.073           | 0.139             | 1.292   | 0.092            | 0.133             | 1.456   |
| Cl <sub>2</sub> ...pyridine          | 0.035        | 0.112             | 0.914   | 0.049           | 0.139             | 1.005   | 0.063           | 0.156             | 1.123   | 0.154           | 0.016             | 1.956   | 0.185            | -0.114            | 2.279   |
| BrF...NH <sub>3</sub>                | 0.053        | 0.132             | 1.115   | 0.070           | 0.141             | 1.271   | 0.078           | 0.140             | 1.344   | 0.084           | 0.137             | 1.396   | 0.093            | 0.133             | 1.471   |
| ClF...NH <sub>3</sub>                | 0.053        | 0.147             | 1.045   | 0.079           | 0.155             | 1.276   | 0.098           | 0.138             | 1.457   | 0.110           | 0.118             | 1.569   | 0.129            | 0.074             | 1.761   |
| I <sub>2</sub> ...NH <sub>3</sub>    | 0.031        | 0.078             | 1.016   | 0.039           | 0.093             | 1.090   | 0.044           | 0.100             | 1.134   | 0.048           | 0.105             | 1.168   | 0.054            | 0.111             | 1.216   |
| Br <sub>2</sub> ...NH <sub>3</sub>   | 0.033        | 0.096             | 0.940   | 0.044           | 0.115             | 1.027   | 0.059           | 0.133             | 1.160   | 0.061           | 0.131             | 1.178   | 0.077            | 0.133             | 1.328   |
| Cl <sub>2</sub> ...NH <sub>3</sub>   | 0.030        | 0.097             | 0.872   | 0.039           | 0.119             | 0.928   | 0.049           | 0.137             | 0.999   | 0.061           | 0.150             | 1.102   | 0.147            | 0.020             | 1.939   |
| BrF...H <sub>2</sub> S               | 0.033        | 0.080             | 0.995   | 0.042           | 0.086             | 1.105   | 0.047           | 0.087             | 1.182   | 0.052           | 0.086             | 1.244   | 0.057            | 0.156             | 1.131   |
| ClF...H <sub>2</sub> S               | 0.030        | 0.083             | 0.914   | 0.040           | 0.094             | 1.015   | 0.055           | 0.100             | 1.201   | 0.057           | 0.098             | 1.222   | 0.056            | 0.172             | 1.049   |
| I <sub>2</sub> ...H <sub>2</sub> S   | 0.019        | 0.058             | 0.946   | 0.022           | 0.066             | 0.967   | 0.023           | 0.068             | 0.976   | 0.023           | 0.070             | 0.981   | 0.030            | 0.083             | 1.042   |
| Br <sub>2</sub> ...H <sub>2</sub> S  | 0.018        | 0.049             | 0.819   | 0.020           | 0.055             | 0.842   | 0.022           | 0.058             | 0.855   | 0.022           | 0.058             | 0.857   | 0.031            | 0.095             | 0.967   |
| Cl <sub>2</sub> ...H <sub>2</sub> S  | 0.016        | 0.048             | 0.785   | 0.018           | 0.053             | 0.795   | 0.018           | 0.055             | 0.800   | 0.019           | 0.056             | 0.803   | 0.027            | 0.093             | 0.913   |
| BrF...Me <sub>2</sub> O              | 0.041        | 0.127             | 1.032   | 0.048           | 0.140             | 1.074   | 0.052           | 0.146             | 1.095   | 0.054           | 0.150             | 1.110   | 0.045            | 0.142             | 1.028   |
| ClF...Me <sub>2</sub> O              | 0.038        | 0.132             | 0.960   | 0.045           | 0.149             | 0.991   | 0.052           | 0.164             | 1.026   | 0.052           | 0.164             | 1.026   | 0.031            | 0.118             | 0.880   |
| I <sub>2</sub> ...Me <sub>2</sub> O  | 0.025        | 0.071             | 1.006   | 0.027           | 0.075             | 1.020   | 0.028           | 0.078             | 1.028   | 0.029           | 0.080             | 1.034   | 0.020            | 0.063             | 0.917   |
| Br <sub>2</sub> ...Me <sub>2</sub> O | 0.025        | 0.081             | 0.943   | 0.028           | 0.088             | 0.955   | 0.029           | 0.091             | 0.960   | 0.030           | 0.093             | 0.963   | 0.018            | 0.065             | 0.834   |
| Cl <sub>2</sub> ...Me <sub>2</sub> O | 0.023        | 0.082             | 0.904   | 0.025           | 0.086             | 0.908   | 0.026           | 0.090             | 0.910   | 0.026           | 0.090             | 0.911   | 0.015            | 0.059             | 0.798   |
| BrF...H <sub>2</sub> O               | 0.031        | 0.104             | 0.969   | 0.038           | 0.121             | 1.002   | 0.040           | 0.127             | 1.017   | 0.042           | 0.131             | 1.029   | 0.045            | 0.137             | 1.045   |
| ClF...H <sub>2</sub> O               | 0.028        | 0.102             | 0.913   | 0.034           | 0.120             | 0.932   | 0.036           | 0.126             | 0.940   | 0.037           | 0.128             | 0.944   | 0.039            | 0.135             | 0.955   |
| I <sub>2</sub> ...H <sub>2</sub> O   | 0.019        | 0.058             | 0.946   | 0.022           | 0.066             | 0.967   | 0.023           | 0.068             | 0.976   | 0.023           | 0.070             | 0.981   | 0.024            | 0.072             | 0.989   |
| Br <sub>2</sub> ...H <sub>2</sub> O  | 0.019        | 0.066             | 0.897   | 0.021           | 0.072             | 0.908   | 0.022           | 0.074             | 0.913   | 0.023           | 0.076             | 0.916   | 0.023            | 0.078             | 0.920   |
| Cl <sub>2</sub> ...H <sub>2</sub> O  | 0.017        | 0.064             | 0.871   | 0.019           | 0.070             | 0.876   | 0.020           | 0.072             | 0.879   | 0.020           | 0.073             | 0.880   | 0.020            | 0.074             | 0.882   |
| BrF...HCN                            | 0.029        | 0.105             | 0.908   | 0.036           | 0.122             | 0.956   | 0.039           | 0.129             | 0.980   | 0.041           | 0.134             | 0.998   | 0.059            | 0.082             | 1.336   |
| ClF...HCN                            | 0.023        | 0.091             | 0.832   | 0.027           | 0.104             | 0.852   | 0.028           | 0.108             | 0.861   | 0.029           | 0.111             | 0.867   | 0.073            | 0.084             | 1.441   |
| I <sub>2</sub> ...HCN                | 0.017        | 0.054             | 0.887   | 0.019           | 0.059             | 0.904   | 0.020           | 0.060             | 0.910   | 0.020           | 0.061             | 0.913   | 0.022            | 0.052             | 0.939   |
| Br <sub>2</sub> ...HCN               | 0.016        | 0.058             | 0.818   | 0.017           | 0.061             | 0.827   | 0.018           | 0.063             | 0.830   | 0.018           | 0.064             | 0.832   | 0.023            | 0.060             | 0.867   |
| Cl <sub>2</sub> ...HCN               | 0.014        | 0.052             | 0.788   | 0.015           | 0.057             | 0.794   | 0.015           | 0.057             | 0.796   | 0.015           | 0.058             | 0.797   | 0.020            | 0.058             | 0.808   |

Table S2. The geometrical parameters of halogen bonds in various environments by M06-2X/ACCD.

| XB donor        | XB acceptor       | $\epsilon = 1.0$ |                  | $\epsilon = 2.27$ |                  | $\epsilon = 4.18$ |                  | $\epsilon = 7.22$ |                  | $\epsilon = 78.36$ |                  |
|-----------------|-------------------|------------------|------------------|-------------------|------------------|-------------------|------------------|-------------------|------------------|--------------------|------------------|
|                 |                   | $R$ (Å)          | $\angle YXR$ (°) | $R$ (Å)           | $\angle YXR$ (°) | $R$ (Å)           | $\angle YXR$ (°) | $R$ (Å)           | $\angle YXR$ (°) | $R$ (Å)            | $\angle YXR$ (°) |
| BrF             | pyridine          | 2.240            | 180.00           | 2.158             | 179.97           | 2.123             | 179.95           | 2.100             | 179.97           | 2.073              | 179.97           |
| ClF             | pyridine          | 2.179            | 179.97           | 2.048             | 180.00           | 1.989             | 180.00           | 1.949             | 180.00           | 1.895              | 179.97           |
| I <sub>2</sub>  | pyridine          | 2.580            | 179.95           | 2.476             | 180.00           | 2.433             | 179.97           | 2.403             | 179.95           | 2.364              | 180.00           |
| Br <sub>2</sub> | pyridine          | 2.429            | 179.95           | 2.282             | 180.00           | 2.213             | 180.00           | 2.170             | 180.00           | 2.099              | 179.95           |
| Cl <sub>2</sub> | pyridine          | 2.526            | 179.88           | 2.325             | 180.00           | 2.123             | 179.96           | 1.975             | 180.00           | 1.780              | 179.94           |
| BrF             | NH <sub>3</sub>   | 2.350            | 179.97           | 2.231             | 180.00           | 2.186             | 180.00           | 2.158             | 179.97           | 2.121              | 180.00           |
| ClF             | NH <sub>3</sub>   | 2.327            | 179.88           | 2.148             | 179.96           | 2.042             | 179.96           | 2.036             | 179.96           | 1.970              | 179.97           |
| I <sub>2</sub>  | NH <sub>3</sub>   | 2.702            | 179.88           | 2.548             | 179.90           | 2.486             | 179.91           | 2.447             | 179.87           | 2.394              | 179.84           |
| Br <sub>2</sub> | NH <sub>3</sub>   | 2.577            | 179.90           | 2.387             | 179.95           | 2.248             | 179.93           | 2.240             | 179.94           | 2.160              | 179.97           |
| Cl <sub>2</sub> | NH <sub>3</sub>   | 2.629            | 179.84           | 2.485             | 180.00           | 2.289             | 179.92           | 2.144             | 179.95           | 1.951              | 179.96           |
| BrF             | H <sub>2</sub> S  | 2.854            | 179.96           | 2.697             | 179.77           | 2.639             | 179.66           | 2.605             | 179.55           | 2.558              | 179.43           |
| ClF             | H <sub>2</sub> S  | 2.895            | 179.26           | 2.762             | 179.83           | 2.576             | 179.71           | 2.565             | 179.69           | 2.470              | 179.57           |
| I <sub>2</sub>  | H <sub>2</sub> S  | 3.272            | 178.20           | 3.200             | 179.43           | 3.163             | 179.84           | 3.130             | 179.94           | 3.074              | 179.77           |
| Br <sub>2</sub> | H <sub>2</sub> S  | 3.129            | 177.89           | 3.057             | 178.89           | 2.982             | 179.82           | 2.975             | 179.86           | 2.909              | 179.87           |
| Cl <sub>2</sub> | H <sub>2</sub> S  | 3.116            | 178.33           | 3.077             | 179.49           | 3.066             | 179.09           | 3.056             | 179.25           | 3.041              | 179.22           |
| BrF             | Me <sub>2</sub> O | 2.424            | 178.02           | 2.340             | 178.89           | 2.306             | 179.17           | 2.285             | 179.33           | 2.258              | 179.52           |
| ClF             | Me <sub>2</sub> O | 2.430            | 177.22           | 2.365             | 178.14           | 2.310             | 178.69           | 2.307             | 178.72           | 2.269              | 179.02           |
| I <sub>2</sub>  | Me <sub>2</sub> O | 2.746            | 176.74           | 2.701             | 177.85           | 2.678             | 178.28           | 2.663             | 178.54           | 2.644              | 178.83           |
| Br <sub>2</sub> | Me <sub>2</sub> O | 2.648            | 175.79           | 2.611             | 177.06           | 2.592             | 177.52           | 2.583             | 177.78           | 2.568              | 178.05           |
| Cl <sub>2</sub> | Me <sub>2</sub> O | 2.628            | 174.65           | 2.607             | 176.04           | 2.594             | 176.80           | 2.593             | 176.84           | 2.586              | 177.19           |
| BrF             | H <sub>2</sub> O  | 2.563            | 179.91           | 2.495             | 179.28           | 2.461             | 179.07           | 2.437             | 178.95           | 2.404              | 178.82           |
| ClF             | H <sub>2</sub> O  | 2.551            | 179.04           | 2.505             | 179.89           | 2.484             | 179.65           | 2.471             | 179.45           | 2.452              | 179.26           |
| I <sub>2</sub>  | H <sub>2</sub> O  | 2.862            | 178.95           | 2.811             | 179.92           | 2.789             | 179.49           | 2.774             | 179.25           | 2.757              | 178.95           |
| Br <sub>2</sub> | H <sub>2</sub> O  | 2.766            | 178.53           | 2.728             | 179.83           | 2.713             | 179.79           | 2.703             | 179.53           | 2.692              | 179.26           |
| Cl <sub>2</sub> | H <sub>2</sub> O  | 2.727            | 178.48           | 2.704             | 179.57           | 2.696             | 179.97           | 2.690             | 179.72           | 2.684              | 179.42           |
| BrF             | HCN               | 2.638            | 179.94           | 2.567             | 179.94           | 2.534             | 179.87           | 2.512             | 179.96           | 2.477              | 179.92           |
| ClF             | HCN               | 2.653            | 180.00           | 2.612             | 180.00           | 2.595             | 180.00           | 2.584             | 180.00           | 2.571              | 179.96           |
| I <sub>2</sub>  | HCN               | 2.959            | 180.00           | 2.918             | 179.97           | 2.902             | 179.97           | 2.892             | 180.00           | 2.880              | 180.00           |
| Br <sub>2</sub> | HCN               | 2.874            | 180.00           | 2.845             | 180.00           | 2.834             | 179.97           | 2.827             | 180.00           | 2.820              | 180.00           |
| Cl <sub>2</sub> | HCN               | 2.846            | 180.00           | 2.827             | 179.97           | 2.820             | 180.00           | 2.816             | 180.00           | 2.812              | 179.97           |

Table S3. GKS-EDA results for XB dimers in gas phase based on M06-2X/ACCD. (kcal/mol)

| XB donor        | XB acceptor       | $\Delta E^{\text{ele}}$ | $\Delta E^{\text{Pauli}}$ | $\Delta E^{\text{pol}}$ | $\Delta E^{\text{corr+disp}}$ | $\Delta E^{\text{int}}$ |
|-----------------|-------------------|-------------------------|---------------------------|-------------------------|-------------------------------|-------------------------|
| BrF             | pyridine          | -50.45                  | 78.43                     | -36.33                  | -10.09                        | -18.44                  |
| ClF             | pyridine          | -41.64                  | 70.91                     | -33.25                  | -11.43                        | -15.42                  |
| I <sub>2</sub>  | pyridine          | -28.56                  | 45.79                     | -19.06                  | -9.13                         | -10.96                  |
| Br <sub>2</sub> | pyridine          | -30.10                  | 49.03                     | -18.24                  | -9.39                         | -8.70                   |
| Cl <sub>2</sub> | pyridine          | -15.78                  | 25.16                     | -8.95                   | -6.48                         | -6.06                   |
| BrF             | NH <sub>3</sub>   | -40.28                  | 58.52                     | -26.87                  | -6.83                         | -15.46                  |
| ClF             | NH <sub>3</sub>   | -29.87                  | 46.44                     | -21.15                  | -7.87                         | -12.46                  |
| I <sub>2</sub>  | NH <sub>3</sub>   | -22.90                  | 33.69                     | -14.06                  | -7.16                         | -10.43                  |
| Br <sub>2</sub> | NH <sub>3</sub>   | -21.97                  | 32.82                     | -12.26                  | -6.34                         | -7.75                   |
| Cl <sub>2</sub> | NH <sub>3</sub>   | -13.19                  | 19.51                     | -7.11                   | -5.13                         | -5.91                   |
| BrF             | H <sub>2</sub> S  | -17.31                  | 28.71                     | -12.97                  | -6.99                         | -8.56                   |
| ClF             | H <sub>2</sub> S  | -10.91                  | 18.49                     | -7.72                   | -6.14                         | -6.28                   |
| I <sub>2</sub>  | H <sub>2</sub> S  | -8.94                   | 15.01                     | -5.83                   | -5.32                         | -5.08                   |
| Br <sub>2</sub> | H <sub>2</sub> S  | -8.77                   | 14.66                     | -4.87                   | -5.63                         | -4.61                   |
| Cl <sub>2</sub> | H <sub>2</sub> S  | -6.12                   | 10.60                     | -3.29                   | -4.61                         | -3.42                   |
| BrF             | Me <sub>2</sub> O | -21.53                  | 30.03                     | -12.62                  | -6.25                         | -10.37                  |
| ClF             | Me <sub>2</sub> O | -14.71                  | 21.22                     | -8.29                   | -6.56                         | -8.34                   |
| I <sub>2</sub>  | Me <sub>2</sub> O | -13.81                  | 19.86                     | -6.48                   | -8.71                         | -9.13                   |
| Br <sub>2</sub> | Me <sub>2</sub> O | -11.81                  | 17.14                     | -5.02                   | -6.25                         | -5.93                   |
| Cl <sub>2</sub> | Me <sub>2</sub> O | -8.39                   | 12.53                     | -3.37                   | -5.97                         | -5.19                   |
| BrF             | H <sub>2</sub> O  | -14.18                  | 17.15                     | -7.56                   | -2.99                         | -7.58                   |
| ClF             | H <sub>2</sub> O  | -10.30                  | 12.92                     | -5.21                   | -3.90                         | -6.49                   |
| I <sub>2</sub>  | H <sub>2</sub> O  | -9.60                   | 12.07                     | -4.31                   | -2.61                         | -4.45                   |
| Br <sub>2</sub> | H <sub>2</sub> O  | -8.15                   | 10.40                     | -3.32                   | -3.19                         | -4.27                   |
| Cl <sub>2</sub> | H <sub>2</sub> O  | -6.14                   | 8.04                      | -2.47                   | -2.91                         | -3.48                   |
| BrF             | HCN               | -11.45                  | 14.70                     | -6.96                   | -3.47                         | -7.17                   |
| ClF             | HCN               | -7.69                   | 9.88                      | -4.24                   | -3.13                         | -5.18                   |
| I <sub>2</sub>  | HCN               | -7.53                   | 10.38                     | -4.06                   | -3.37                         | -4.58                   |
| Br <sub>2</sub> | HCN               | -5.98                   | 8.11                      | -2.83                   | -2.95                         | -3.65                   |
| Cl <sub>2</sub> | HCN               | -4.35                   | 5.93                      | -1.95                   | -2.41                         | -2.78                   |

Table S4. The bond distance difference ( $\Delta R$ , Å) and the binding energy difference ( $\Delta\Delta G^{\text{int}}$ , kcal/mol) by GKS-EDA in various solutions by  $\omega$ B97X-D/ACCD.

|           |                                      | $\epsilon=2.27$ |                               | $\epsilon=4.18$ |                               | $\epsilon=7.22$ |                               | $\epsilon=78.36$ |                               |
|-----------|--------------------------------------|-----------------|-------------------------------|-----------------|-------------------------------|-----------------|-------------------------------|------------------|-------------------------------|
|           |                                      | $\Delta R$      | $\Delta\Delta G^{\text{int}}$ | $\Delta R$      | $\Delta\Delta G^{\text{int}}$ | $\Delta R$      | $\Delta\Delta G^{\text{int}}$ | $\Delta R$       | $\Delta\Delta G^{\text{int}}$ |
| Type A    | BrF...pyridine                       | -0.09           | -6.53                         | -0.13           | -10.44                        | -0.16           | -13.34                        | -0.19            | -17.49                        |
|           | ClF...pyridine                       | -0.16           | -9.95                         | -0.22           | -16.78                        | -0.26           | -22.89                        | -0.31            | -32.01                        |
|           | I <sub>2</sub> ...pyridine           | -0.09           | -1.82                         | -0.13           | -2.87                         | -0.16           | -3.68                         | -0.20            | -4.96                         |
|           | Br <sub>2</sub> ...pyridine          | -0.12           | -2.55                         | -0.20           | -4.80                         | -0.26           | -6.99                         | -0.36            | -12.52                        |
|           | Cl <sub>2</sub> ...pyridine          | -0.14           | -2.11                         | -0.26           | -4.63                         | -0.64           | -31.03                        | -0.72            | -52.80                        |
|           | BrF...NH <sub>3</sub>                | -0.12           | -5.38                         | -0.17           | -8.46                         | -0.20           | -10.83                        | -0.25            | -14.48                        |
|           | ClF...NH <sub>3</sub>                | -0.17           | -7.44                         | -0.25           | -13.31                        | -0.30           | -17.81                        | -0.37            | -26.49                        |
|           | I <sub>2</sub> ...NH <sub>3</sub>    | -0.13           | -2.30                         | -0.19           | -3.66                         | -0.23           | -4.71                         | -0.28            | -6.37                         |
|           | Br <sub>2</sub> ...NH <sub>3</sub>   | -0.13           | -2.51                         | -0.26           | -5.08                         | -0.27           | -6.13                         | -0.38            | -10.03                        |
|           | Cl <sub>2</sub> ...NH <sub>3</sub>   | -0.12           | -1.93                         | -0.22           | -3.68                         | -0.32           | -27.56                        | -0.69            | -31.54                        |
|           | BrF...H <sub>2</sub> S               | -0.11           | -2.98                         | -0.17           | -4.89                         | -0.21           | -6.42                         | -0.26            | -8.90                         |
|           | ClF...H <sub>2</sub> S               | -0.12           | -2.41                         | -0.27           | -5.66                         | -0.28           | -6.59                         | -0.39            | -11.64                        |
|           | BrF...Me <sub>2</sub> O              | -0.07           | -2.02                         | -0.10           | -3.06                         | -0.12           | -3.79                         | -0.14            | -4.79                         |
|           | ClF...Me <sub>2</sub> O              | -0.07           | -1.51                         | -0.12           | -2.57                         | -0.13           | -2.93                         | -0.16            | -3.83                         |
|           | BrF...H <sub>2</sub> O               | -0.08           | -1.21                         | -0.11           | -1.80                         | -0.13           | -2.20                         | -0.16            | -2.81                         |
|           | ClF...H <sub>2</sub> O               | -0.08           | -0.64                         | -0.11           | -0.93                         | -0.12           | -1.13                         | -0.14            | -1.41                         |
|           | BrF...HCN                            | -0.06           | -1.53                         | -0.08           | -2.29                         | -0.10           | -2.79                         | -0.13            | -3.49                         |
| ClF...HCN | -0.09                                | -1.04           | -0.12                         | -1.53           | -0.15                         | -1.83           | -0.19                         | -2.30            |                               |
| Type B    | I <sub>2</sub> ...H <sub>2</sub> S   | -0.07           | -0.54                         | -0.11           | -0.79                         | -0.14           | -0.97                         | -0.18            | -1.20                         |
|           | Br <sub>2</sub> ...H <sub>2</sub> S  | -0.08           | -0.53                         | -0.11           | -0.80                         | -0.11           | -0.92                         | -0.13            | -1.15                         |
|           | Cl <sub>2</sub> ...H <sub>2</sub> S  | -0.06           | -0.34                         | -0.08           | -0.49                         | -0.09           | -0.58                         | -0.11            | -0.71                         |
|           | I <sub>2</sub> ...Me <sub>2</sub> O  | -0.04           | -0.43                         | -0.06           | -0.60                         | -0.07           | -0.71                         | -0.09            | -0.84                         |
|           | Br <sub>2</sub> ...Me <sub>2</sub> O | -0.05           | -0.31                         | -0.07           | -0.46                         | -0.08           | -0.56                         | -0.09            | -0.69                         |
|           | Cl <sub>2</sub> ...Me <sub>2</sub> O | -0.03           | -0.25                         | -0.05           | -0.39                         | -0.05           | -0.44                         | -0.07            | -0.53                         |
|           | I <sub>2</sub> ...H <sub>2</sub> O   | -0.07           | -0.25                         | -0.09           | -0.37                         | -0.11           | -0.43                         | -0.12            | -0.52                         |
|           | Br <sub>2</sub> ...H <sub>2</sub> O  | -0.05           | -0.15                         | -0.06           | -0.22                         | -0.08           | -0.26                         | -0.09            | -0.32                         |
|           | Cl <sub>2</sub> ...H <sub>2</sub> O  | -0.05           | -0.04                         | -0.06           | -0.06                         | -0.07           | -0.07                         | -0.08            | -0.09                         |
|           | I <sub>2</sub> ...HCN                | -0.05           | -0.37                         | -0.06           | -0.55                         | -0.07           | -0.67                         | -0.08            | -0.83                         |
|           | Br <sub>2</sub> ...HCN               | -0.03           | -0.36                         | -0.04           | -0.51                         | -0.05           | -0.61                         | -0.05            | -0.73                         |
|           | Cl <sub>2</sub> ...HCN               | -0.04           | -0.23                         | -0.04           | -0.32                         | -0.05           | -0.38                         | -0.05            | -0.45                         |

Table S5. The GKS-EDA results with  $\epsilon=2.27$  calculated at  $\omega$ B97X-D/ACCD. (kcal/mol)

| XB donor        | XB acceptor       | $\Delta G^{\text{ele}}$ | $\Delta G^{\text{Pauli}}$ | $\Delta G^{\text{pol}}$ | $\Delta G^{\text{desol}}$ | $\Delta G^{\text{corr+disp}}$ | $\Delta G^{\text{int}}$ |
|-----------------|-------------------|-------------------------|---------------------------|-------------------------|---------------------------|-------------------------------|-------------------------|
| BrF             | pyridine          | -65.17                  | 102.16                    | -46.65                  | -4.46                     | -11.99                        | -26.11                  |
| ClF             | pyridine          | -69.30                  | 124.37                    | -61.46                  | -5.19                     | -15.54                        | -27.12                  |
| I <sub>2</sub>  | pyridine          | -32.55                  | 52.06                     | -20.70                  | -1.60                     | -9.96                         | -12.75                  |
| Br <sub>2</sub> | pyridine          | -36.33                  | 59.53                     | -21.45                  | -1.83                     | -11.38                        | -11.45                  |
| Cl <sub>2</sub> | pyridine          | -25.98                  | 44.90                     | -15.02                  | -1.32                     | -11.44                        | -8.85                   |
| BrF             | NH <sub>3</sub>   | -56.84                  | 85.43                     | -37.29                  | -4.20                     | -8.99                         | -21.87                  |
| ClF             | NH <sub>3</sub>   | -51.86                  | 88.19                     | -40.28                  | -5.07                     | -12.50                        | -21.51                  |
| I <sub>2</sub>  | NH <sub>3</sub>   | -29.60                  | 45.27                     | -17.42                  | -2.36                     | -8.44                         | -12.57                  |
| Br <sub>2</sub> | NH <sub>3</sub>   | -30.79                  | 48.02                     | -16.56                  | -2.28                     | -8.90                         | -10.51                  |
| Cl <sub>2</sub> | NH <sub>3</sub>   | -21.79                  | 35.56                     | -11.32                  | -1.59                     | -9.04                         | -8.18                   |
| BrF             | H <sub>2</sub> S  | -25.57                  | 44.92                     | -19.57                  | -2.36                     | -9.53                         | -12.11                  |
| ClF             | H <sub>2</sub> S  | -19.84                  | 37.80                     | -15.11                  | -1.63                     | -10.51                        | -9.30                   |
| I <sub>2</sub>  | H <sub>2</sub> S  | -9.72                   | 16.42                     | -6.16                   | -0.46                     | -5.36                         | -5.26                   |
| Br <sub>2</sub> | H <sub>2</sub> S  | -10.19                  | 17.47                     | -5.61                   | -0.45                     | -5.90                         | -4.67                   |
| Cl <sub>2</sub> | H <sub>2</sub> S  | -6.99                   | 12.41                     | -3.48                   | -0.27                     | -4.93                         | -3.25                   |
| BrF             | Me <sub>2</sub> O | -27.03                  | 38.92                     | -15.14                  | -1.55                     | -7.72                         | -12.52                  |
| ClF             | Me <sub>2</sub> O | -20.33                  | 31.43                     | -11.02                  | -1.07                     | -8.83                         | -9.82                   |
| I <sub>2</sub>  | Me <sub>2</sub> O | -14.12                  | 19.85                     | -6.24                   | -0.36                     | -8.72                         | -9.59                   |
| Br <sub>2</sub> | Me <sub>2</sub> O | -12.87                  | 18.52                     | -4.99                   | -0.29                     | -5.83                         | -5.46                   |
| Cl <sub>2</sub> | Me <sub>2</sub> O | -8.97                   | 13.26                     | -3.12                   | -0.16                     | -5.75                         | -4.73                   |
| BrF             | H <sub>2</sub> O  | -18.24                  | 26.47                     | -9.72                   | -1.47                     | -5.84                         | -8.51                   |
| ClF             | H <sub>2</sub> O  | -10.81                  | 15.19                     | -4.86                   | -0.94                     | -4.45                         | -5.52                   |
| I <sub>2</sub>  | H <sub>2</sub> O  | -8.93                   | 12.34                     | -3.87                   | -0.48                     | -3.75                         | -4.53                   |
| Br <sub>2</sub> | H <sub>2</sub> O  | -6.99                   | 9.40                      | -2.50                   | -0.38                     | -3.22                         | -3.47                   |
| Cl <sub>2</sub> | H <sub>2</sub> O  | -4.79                   | 6.34                      | -1.53                   | -0.24                     | -2.34                         | -2.36                   |
| BrF             | HCN               | -20.15                  | 27.16                     | -9.54                   | -1.18                     | -4.90                         | -8.89                   |
| ClF             | HCN               | -14.48                  | 20.53                     | -6.45                   | -0.60                     | -5.81                         | -7.15                   |
| I <sub>2</sub>  | HCN               | -11.07                  | 14.27                     | -3.99                   | -0.32                     | -2.01                         | -3.27                   |
| Br <sub>2</sub> | HCN               | -9.41                   | 12.32                     | -3.04                   | -0.17                     | -3.22                         | -3.72                   |
| Cl <sub>2</sub> | HCN               | -6.80                   | 9.10                      | -2.04                   | -0.05                     | -2.91                         | -2.89                   |

Table S6. The GKS-EDA results with  $\epsilon=4.18$  calculated at  $\omega$ B97X-D/ACCD. (kcal/mol)

| XB donor        | XB acceptor       | $\Delta G^{\text{ele}}$ | $\Delta G^{\text{Pauli}}$ | $\Delta G^{\text{pol}}$ | $\Delta G^{\text{desol}}$ | $\Delta G^{\text{corr+disp}}$ | $\Delta G^{\text{int}}$ |
|-----------------|-------------------|-------------------------|---------------------------|-------------------------|---------------------------|-------------------------------|-------------------------|
| BrF             | pyridine          | -74.06                  | 117.53                    | -53.50                  | -7.18                     | -12.81                        | -30.02                  |
| ClF             | pyridine          | -84.02                  | 153.47                    | -78.35                  | -9.07                     | -15.98                        | -33.95                  |
| I <sub>2</sub>  | pyridine          | -36.85                  | 60.19                     | -23.70                  | -2.63                     | -10.80                        | -13.80                  |
| Br <sub>2</sub> | pyridine          | -45.93                  | 77.46                     | -28.54                  | -3.48                     | -13.21                        | -13.70                  |
| Cl <sub>2</sub> | pyridine          | -36.30                  | 65.78                     | -23.57                  | -2.87                     | -14.41                        | -11.37                  |
| BrF             | NH <sub>3</sub>   | -65.08                  | 99.36                     | -42.79                  | -6.74                     | -9.69                         | -24.95                  |
| ClF             | NH <sub>3</sub>   | -66.71                  | 117.57                    | -55.41                  | -9.29                     | -13.55                        | -27.38                  |
| I <sub>2</sub>  | NH <sub>3</sub>   | -34.41                  | 54.26                     | -20.40                  | -3.91                     | -9.47                         | -13.93                  |
| Br <sub>2</sub> | NH <sub>3</sub>   | -44.80                  | 74.01                     | -26.27                  | -4.89                     | -11.14                        | -13.08                  |
| Cl <sub>2</sub> | NH <sub>3</sub>   | -28.73                  | 49.22                     | -16.04                  | -3.08                     | -11.31                        | -9.93                   |
| BrF             | H <sub>2</sub> S  | -29.82                  | 53.55                     | -23.05                  | -3.94                     | -10.75                        | -14.02                  |
| ClF             | H <sub>2</sub> S  | -29.49                  | 59.58                     | -25.43                  | -3.69                     | -13.52                        | -12.55                  |
| I <sub>2</sub>  | H <sub>2</sub> S  | -10.48                  | 18.10                     | -6.71                   | -0.69                     | -5.72                         | -5.51                   |
| Br <sub>2</sub> | H <sub>2</sub> S  | -11.09                  | 19.36                     | -6.14                   | -0.69                     | -6.38                         | -4.94                   |
| Cl <sub>2</sub> | H <sub>2</sub> S  | -7.39                   | 13.30                     | -3.67                   | -0.39                     | -5.24                         | -3.40                   |
| BrF             | Me <sub>2</sub> O | -29.49                  | 43.08                     | -16.42                  | -2.39                     | -8.35                         | -13.56                  |
| ClF             | Me <sub>2</sub> O | -23.88                  | 38.25                     | -13.45                  | -1.84                     | -9.96                         | -10.88                  |
| I <sub>2</sub>  | Me <sub>2</sub> O | -14.89                  | 21.20                     | -6.55                   | -0.55                     | -8.98                         | -9.76                   |
| Br <sub>2</sub> | Me <sub>2</sub> O | -13.52                  | 19.64                     | -5.19                   | -0.43                     | -6.10                         | -5.61                   |
| Cl <sub>2</sub> | Me <sub>2</sub> O | -9.52                   | 14.27                     | -3.27                   | -0.26                     | -6.09                         | -4.87                   |
| BrF             | H <sub>2</sub> O  | -20.31                  | 29.97                     | -10.53                  | -2.23                     | -6.42                         | -9.10                   |
| ClF             | H <sub>2</sub> O  | -11.69                  | 16.58                     | -4.98                   | -1.41                     | -4.84                         | -5.81                   |
| I <sub>2</sub>  | H <sub>2</sub> O  | -9.34                   | 12.96                     | -3.91                   | -0.71                     | -3.88                         | -4.65                   |
| Br <sub>2</sub> | H <sub>2</sub> O  | -7.31                   | 9.85                      | -2.47                   | -0.56                     | -3.36                         | -3.54                   |
| Cl <sub>2</sub> | H <sub>2</sub> O  | -4.97                   | 6.53                      | -1.45                   | -0.34                     | -2.42                         | -2.38                   |
| BrF             | HCN               | -21.86                  | 30.03                     | -10.12                  | -1.80                     | -5.47                         | -9.65                   |
| ClF             | HCN               | -15.51                  | 22.33                     | -6.71                   | -0.89                     | -6.34                         | -7.64                   |
| I <sub>2</sub>  | HCN               | -11.74                  | 15.42                     | -4.15                   | -0.46                     | -2.26                         | -3.45                   |
| Br <sub>2</sub> | HCN               | -9.83                   | 13.01                     | -3.07                   | -0.25                     | -3.43                         | -3.87                   |
| Cl <sub>2</sub> | HCN               | -7.05                   | 9.53                      | -2.03                   | -0.07                     | -3.09                         | -2.98                   |

Table S7. The GKS-EDA results with  $\epsilon=7.22$  calculated at  $\omega$ B97X-D/ACCD. (kcal/mol)

| XB donor        | XB acceptor       | $\Delta G^{\text{ele}}$ | $\Delta G^{\text{Pauli}}$ | $\Delta G^{\text{pol}}$ | $\Delta G^{\text{desol}}$ | $\Delta G^{\text{corr+disp}}$ | $\Delta G^{\text{int}}$ |
|-----------------|-------------------|-------------------------|---------------------------|-------------------------|---------------------------|-------------------------------|-------------------------|
| BrF             | pyridine          | -79.87                  | 127.52                    | -58.02                  | -9.19                     | -13.36                        | -32.92                  |
| ClF             | pyridine          | -95.53                  | 176.23                    | -92.47                  | -12.49                    | -15.80                        | -40.06                  |
| I <sub>2</sub>  | pyridine          | -39.90                  | 65.99                     | -25.86                  | -3.43                     | -11.41                        | -14.61                  |
| Br <sub>2</sub> | pyridine          | -54.60                  | 93.78                     | -35.33                  | -5.14                     | -14.61                        | -15.89                  |
| Cl <sub>2</sub> | pyridine          | -112.96                 | 224.75                    | -118.23                 | -15.79                    | -15.54                        | -37.77                  |
| BrF             | NH <sub>3</sub>   | -71.22                  | 109.82                    | -47.06                  | -8.69                     | -10.16                        | -27.32                  |
| ClF             | NH <sub>3</sub>   | -75.86                  | 135.73                    | -65.16                  | -12.62                    | -13.97                        | -31.88                  |
| I <sub>2</sub>  | NH <sub>3</sub>   | -38.38                  | 61.80                     | -22.90                  | -5.19                     | -10.31                        | -14.98                  |
| Br <sub>2</sub> | NH <sub>3</sub>   | -46.25                  | 76.54                     | -26.59                  | -5.95                     | -11.87                        | -14.13                  |
| Cl <sub>2</sub> | NH <sub>3</sub>   | -108.56                 | 215.67                    | -108.62                 | -19.78                    | -12.51                        | -33.81                  |
| BrF             | H <sub>2</sub> S  | -33.28                  | 60.67                     | -25.93                  | -5.26                     | -11.74                        | -15.55                  |
| ClF             | H <sub>2</sub> S  | -30.29                  | 61.38                     | -25.89                  | -4.51                     | -14.17                        | -13.48                  |
| I <sub>2</sub>  | H <sub>2</sub> S  | -11.38                  | 20.07                     | -7.37                   | -0.90                     | -6.11                         | -5.69                   |
| Br <sub>2</sub> | H <sub>2</sub> S  | -11.15                  | 19.49                     | -6.10                   | -0.81                     | -6.50                         | -5.06                   |
| Cl <sub>2</sub> | H <sub>2</sub> S  | -7.56                   | 13.66                     | -3.72                   | -0.47                     | -5.40                         | -3.49                   |
| BrF             | Me <sub>2</sub> O | -31.29                  | 46.17                     | -17.37                  | -2.99                     | -8.80                         | -14.29                  |
| ClF             | Me <sub>2</sub> O | -24.23                  | 38.79                     | -13.37                  | -2.18                     | -10.25                        | -11.24                  |
| I <sub>2</sub>  | Me <sub>2</sub> O | -15.55                  | 22.39                     | -6.87                   | -0.68                     | -9.16                         | -9.87                   |
| Br <sub>2</sub> | Me <sub>2</sub> O | -13.92                  | 20.33                     | -5.31                   | -0.53                     | -6.28                         | -5.71                   |
| Cl <sub>2</sub> | Me <sub>2</sub> O | -9.58                   | 14.35                     | -3.21                   | -0.30                     | -6.17                         | -4.92                   |
| BrF             | H <sub>2</sub> O  | -21.94                  | 32.83                     | -11.28                  | -2.77                     | -6.85                         | -9.50                   |
| ClF             | H <sub>2</sub> O  | -12.27                  | 17.51                     | -5.07                   | -1.71                     | -5.09                         | -6.01                   |
| I <sub>2</sub>  | H <sub>2</sub> O  | -9.60                   | 13.35                     | -3.95                   | -0.87                     | -3.97                         | -4.71                   |
| Br <sub>2</sub> | H <sub>2</sub> O  | -7.53                   | 10.17                     | -2.47                   | -0.67                     | -3.45                         | -3.58                   |
| Cl <sub>2</sub> | H <sub>2</sub> O  | -5.08                   | 6.66                      | -1.41                   | -0.40                     | -2.47                         | -2.39                   |
| BrF             | HCN               | -23.12                  | 32.21                     | -10.58                  | -2.26                     | -5.89                         | -10.15                  |
| ClF             | HCN               | -16.10                  | 23.36                     | -6.82                   | -1.08                     | -6.67                         | -7.94                   |
| I <sub>2</sub>  | HCN               | -12.16                  | 16.16                     | -4.26                   | -0.55                     | -2.43                         | -3.57                   |
| Br <sub>2</sub> | HCN               | -10.14                  | 13.55                     | -3.12                   | -0.31                     | -3.59                         | -3.97                   |
| Cl <sub>2</sub> | HCN               | -7.19                   | 9.77                      | -2.02                   | -0.09                     | -3.19                         | -3.04                   |



Table S8. GKS-EDA results for XB dimers in solution ( $\epsilon=2.27$ ) based on M06-2X/ACCD. (kcal/mol)

| XB donor        | XB acceptor       | $\Delta G^{\text{ele}}$ | $\Delta G^{\text{Pauli}}$ | $\Delta G^{\text{pol}}$ | $\Delta G^{\text{desol}}$ | $\Delta G^{\text{corr+disp}}$ | $\Delta G^{\text{int}}$ |
|-----------------|-------------------|-------------------------|---------------------------|-------------------------|---------------------------|-------------------------------|-------------------------|
| BrF             | pyridine          | -64.69                  | 102.80                    | -47.41                  | -4.22                     | -11.29                        | -24.81                  |
| ClF             | pyridine          | -61.80                  | 110.23                    | -54.14                  | -4.32                     | -13.53                        | -23.57                  |
| I <sub>2</sub>  | pyridine          | -38.01                  | 63.65                     | -26.05                  | -1.98                     | -10.77                        | -13.17                  |
| Br <sub>2</sub> | pyridine          | -46.45                  | 79.46                     | -30.31                  | -2.64                     | -13.07                        | -13.00                  |
| Cl <sub>2</sub> | pyridine          | -28.08                  | 49.45                     | -17.69                  | -1.42                     | -10.66                        | -8.41                   |
| BrF             | NH <sub>3</sub>   | -56.87                  | 86.51                     | -38.14                  | -4.09                     | -8.30                         | -20.89                  |
| ClF             | NH <sub>3</sub>   | -49.54                  | 84.22                     | -38.98                  | -4.63                     | -10.64                        | -19.58                  |
| I <sub>2</sub>  | NH <sub>3</sub>   | -34.06                  | 54.40                     | -21.69                  | -2.78                     | -8.94                         | -13.08                  |
| Br <sub>2</sub> | NH <sub>3</sub>   | -37.43                  | 60.87                     | -22.03                  | -2.98                     | -9.72                         | -11.28                  |
| Cl <sub>2</sub> | NH <sub>3</sub>   | -19.79                  | 31.75                     | -10.85                  | -1.33                     | -7.17                         | -7.39                   |
| BrF             | H <sub>2</sub> S  | -26.05                  | 46.27                     | -20.12                  | -2.30                     | -9.38                         | -11.58                  |
| ClF             | H <sub>2</sub> S  | -15.33                  | 27.83                     | -11.36                  | -1.06                     | -7.77                         | -7.69                   |
| I <sub>2</sub>  | H <sub>2</sub> S  | -10.57                  | 18.46                     | -7.00                   | -0.50                     | -6.01                         | -5.62                   |
| Br <sub>2</sub> | H <sub>2</sub> S  | -10.51                  | 18.20                     | -5.84                   | -0.47                     | -6.57                         | -5.20                   |
| Cl <sub>2</sub> | H <sub>2</sub> S  | -6.77                   | 11.92                     | -3.60                   | -0.23                     | -5.02                         | -3.70                   |
| BrF             | Me <sub>2</sub> O | -27.38                  | 39.83                     | -16.01                  | -1.34                     | -7.06                         | -11.96                  |
| ClF             | Me <sub>2</sub> O | -17.85                  | 26.63                     | -10.01                  | -0.70                     | -7.27                         | -9.20                   |
| I <sub>2</sub>  | Me <sub>2</sub> O | -15.54                  | 22.77                     | -7.32                   | -0.35                     | -9.15                         | -9.59                   |
| Br <sub>2</sub> | Me <sub>2</sub> O | -13.14                  | 19.30                     | -5.50                   | -0.19                     | -6.56                         | -6.10                   |
| Cl <sub>2</sub> | Me <sub>2</sub> O | -8.97                   | 13.40                     | -3.49                   | -0.07                     | -6.19                         | -5.32                   |
| BrF             | H <sub>2</sub> O  | -17.21                  | 21.82                     | -8.84                   | -1.08                     | -3.24                         | -8.55                   |
| ClF             | H <sub>2</sub> O  | -11.89                  | 15.38                     | -5.72                   | -0.62                     | -4.30                         | -7.16                   |
| I <sub>2</sub>  | H <sub>2</sub> O  | -11.07                  | 14.46                     | -4.79                   | -0.42                     | -2.89                         | -4.73                   |
| Br <sub>2</sub> | H <sub>2</sub> O  | -9.10                   | 11.89                     | -3.54                   | -0.32                     | -3.46                         | -4.52                   |
| Cl <sub>2</sub> | H <sub>2</sub> O  | -6.65                   | 8.83                      | -2.52                   | -0.19                     | -3.13                         | -3.66                   |
| BrF             | HCN               | -14.41                  | 19.12                     | -7.99                   | -0.83                     | -3.88                         | -7.99                   |
| ClF             | HCN               | -9.07                   | 11.66                     | -4.33                   | -0.39                     | -3.47                         | -5.59                   |
| I <sub>2</sub>  | HCN               | -8.62                   | 12.02                     | -4.29                   | -0.29                     | -3.66                         | -4.83                   |
| Br <sub>2</sub> | HCN               | -6.75                   | 9.10                      | -2.79                   | -0.14                     | -3.19                         | -3.77                   |
| Cl <sub>2</sub> | HCN               | -4.82                   | 6.48                      | -1.83                   | -0.05                     | -2.59                         | -2.83                   |

Table S9. GKS-EDA results for XB dimers in solution ( $\epsilon=4.18$ ) based on M06-2X/ACCD. (kcal/mol)

| XB donor        | XB acceptor       | $\Delta G^{\text{ele}}$ | $\Delta G^{\text{Pauli}}$ | $\Delta G^{\text{pol}}$ | $\Delta G^{\text{desol}}$ | $\Delta G^{\text{corr+disp}}$ | $\Delta G^{\text{int}}$ |
|-----------------|-------------------|-------------------------|---------------------------|-------------------------|---------------------------|-------------------------------|-------------------------|
| BrF             | pyridine          | -72.00                  | 115.43                    | -53.61                  | -6.63                     | -11.52                        | -28.34                  |
| ClF             | pyridine          | -73.68                  | 133.67                    | -68.04                  | -7.37                     | -13.57                        | -28.99                  |
| I <sub>2</sub>  | pyridine          | -42.85                  | 72.95                     | -29.96                  | -3.26                     | -11.40                        | -14.52                  |
| Br <sub>2</sub> | pyridine          | -57.04                  | 99.36                     | -39.43                  | -4.80                     | -14.41                        | -16.31                  |
| Cl <sub>2</sub> | pyridine          | -50.83                  | 96.05                     | -40.31                  | -4.53                     | -14.92                        | -14.54                  |
| BrF             | NH <sub>3</sub>   | -64.89                  | 100.17                    | -44.13                  | -6.51                     | -8.56                         | -23.93                  |
| ClF             | NH <sub>3</sub>   | -66.58                  | 118.22                    | -57.97                  | -8.92                     | -10.85                        | -26.10                  |
| I <sub>2</sub>  | NH <sub>3</sub>   | -40.12                  | 65.94                     | -26.26                  | -4.68                     | -9.60                         | -14.71                  |
| Br <sub>2</sub> | NH <sub>3</sub>   | -55.20                  | 94.28                     | -36.24                  | -6.47                     | -11.60                        | -15.23                  |
| Cl <sub>2</sub> | NH <sub>3</sub>   | -33.99                  | 60.04                     | -21.93                  | -3.79                     | -10.72                        | -10.39                  |
| BrF             | H <sub>2</sub> S  | -30.33                  | 55.04                     | -24.04                  | -3.84                     | -10.31                        | -13.49                  |
| ClF             | H <sub>2</sub> S  | -24.82                  | 49.16                     | -20.98                  | -2.77                     | -10.73                        | -10.14                  |
| I <sub>2</sub>  | H <sub>2</sub> S  | -11.46                  | 20.49                     | -7.71                   | -0.81                     | -6.48                         | -5.96                   |
| Br <sub>2</sub> | H <sub>2</sub> S  | -12.70                  | 22.74                     | -7.25                   | -0.86                     | -7.57                         | -5.63                   |
| Cl <sub>2</sub> | H <sub>2</sub> S  | -6.95                   | 12.37                     | -3.69                   | -0.33                     | -5.20                         | -3.81                   |
| BrF             | Me <sub>2</sub> O | -30.23                  | 44.73                     | -17.73                  | -2.13                     | -7.49                         | -12.85                  |
| ClF             | Me <sub>2</sub> O | -20.85                  | 32.21                     | -12.02                  | -1.22                     | -7.94                         | -9.82                   |
| I <sub>2</sub>  | Me <sub>2</sub> O | -16.50                  | 24.47                     | -7.85                   | -0.55                     | -9.38                         | -9.81                   |
| Br <sub>2</sub> | Me <sub>2</sub> O | -13.84                  | 20.49                     | -5.79                   | -0.30                     | -6.74                         | -6.18                   |
| Cl <sub>2</sub> | Me <sub>2</sub> O | -9.31                   | 13.97                     | -3.62                   | -0.12                     | -6.32                         | -5.41                   |
| BrF             | H <sub>2</sub> O  | -18.91                  | 24.63                     | -9.67                   | -1.66                     | -3.41                         | -9.02                   |
| ClF             | H <sub>2</sub> O  | -12.64                  | 16.60                     | -6.00                   | -0.92                     | -4.48                         | -7.45                   |
| I <sub>2</sub>  | H <sub>2</sub> O  | -11.75                  | 15.63                     | -5.07                   | -0.64                     | -3.02                         | -4.85                   |
| Br <sub>2</sub> | H <sub>2</sub> O  | -9.53                   | 12.62                     | -3.66                   | -0.46                     | -3.59                         | -4.63                   |
| Cl <sub>2</sub> | H <sub>2</sub> O  | -6.84                   | 9.13                      | -2.54                   | -0.27                     | -3.20                         | -3.73                   |
| BrF             | HCN               | -15.95                  | 21.56                     | -8.63                   | -1.26                     | -4.10                         | -8.37                   |
| ClF             | HCN               | -9.68                   | 12.48                     | -4.40                   | -0.57                     | -3.61                         | -5.78                   |
| I <sub>2</sub>  | HCN               | -9.06                   | 12.73                     | -4.41                   | -0.42                     | -3.78                         | -4.94                   |
| Br <sub>2</sub> | HCN               | -7.06                   | 9.51                      | -2.78                   | -0.21                     | -3.30                         | -3.83                   |
| Cl <sub>2</sub> | HCN               | -5.01                   | 6.68                      | -1.79                   | -0.08                     | -2.67                         | -2.85                   |

Table S10. GKS-EDA results for XB dimers in solution ( $\epsilon=7.22$ ) based on M06-2X/ACCD. (kcal/mol)

| XB donor        | XB acceptor       | $\Delta G^{\text{ele}}$ | $\Delta G^{\text{Pauli}}$ | $\Delta G^{\text{pol}}$ | $\Delta G^{\text{desol}}$ | $\Delta G^{\text{corr+disp}}$ | $\Delta G^{\text{int}}$ |
|-----------------|-------------------|-------------------------|---------------------------|-------------------------|---------------------------|-------------------------------|-------------------------|
| BrF             | pyridine          | -76.96                  | 123.98                    | -57.97                  | -8.38                     | -11.54                        | -30.87                  |
| ClF             | pyridine          | -83.11                  | 152.36                    | -79.83                  | -9.97                     | -13.05                        | -33.60                  |
| I <sub>2</sub>  | pyridine          | -46.55                  | 80.14                     | -33.13                  | -4.28                     | -11.76                        | -15.57                  |
| Br <sub>2</sub> | pyridine          | -64.83                  | 114.04                    | -46.63                  | -6.61                     | -14.94                        | -18.96                  |
| Cl <sub>2</sub> | pyridine          | -79.22                  | 154.86                    | -75.46                  | -9.42                     | -14.71                        | -23.96                  |
| BrF             | NH <sub>3</sub>   | -70.37                  | 109.54                    | -48.43                  | -8.29                     | -8.59                         | -26.14                  |
| ClF             | NH <sub>3</sub>   | -68.10                  | 120.86                    | -59.36                  | -10.69                    | -10.75                        | -28.04                  |
| I <sub>2</sub>  | NH <sub>3</sub>   | -44.43                  | 74.26                     | -29.70                  | -6.17                     | -9.91                         | -15.95                  |
| Br <sub>2</sub> | NH <sub>3</sub>   | -56.71                  | 96.93                     | -37.26                  | -7.85                     | -11.75                        | -16.64                  |
| Cl <sub>2</sub> | NH <sub>3</sub>   | -51.31                  | 95.56                     | -39.43                  | -7.46                     | -12.62                        | -15.26                  |
| BrF             | H <sub>2</sub> S  | -33.20                  | 60.98                     | -26.87                  | -5.03                     | -10.80                        | -14.93                  |
| ClF             | H <sub>2</sub> S  | -25.59                  | 50.90                     | -21.74                  | -3.39                     | -11.01                        | -10.83                  |
| I <sub>2</sub>  | H <sub>2</sub> S  | -12.40                  | 22.57                     | -8.42                   | -1.05                     | -6.88                         | -6.17                   |
| Br <sub>2</sub> | H <sub>2</sub> S  | -12.92                  | 23.23                     | -7.32                   | -1.02                     | -7.76                         | -5.80                   |
| Cl <sub>2</sub> | H <sub>2</sub> S  | -7.12                   | 12.74                     | -3.78                   | -0.40                     | -5.34                         | -3.89                   |
| BrF             | Me <sub>2</sub> O | -32.15                  | 48.07                     | -18.92                  | -2.70                     | -7.78                         | -13.48                  |
| ClF             | Me <sub>2</sub> O | -21.13                  | 32.63                     | -12.05                  | -1.45                     | -8.04                         | -10.05                  |
| I <sub>2</sub>  | Me <sub>2</sub> O | -17.15                  | 25.65                     | -8.22                   | -0.69                     | -9.54                         | -9.95                   |
| Br <sub>2</sub> | Me <sub>2</sub> O | -14.80                  | 22.19                     | -6.27                   | -0.41                     | -6.96                         | -6.25                   |
| Cl <sub>2</sub> | Me <sub>2</sub> O | -9.36                   | 14.02                     | -3.59                   | -0.14                     | -6.36                         | -5.43                   |
| BrF             | H <sub>2</sub> O  | -20.21                  | 26.85                     | -10.34                  | -2.09                     | -3.54                         | -9.34                   |
| ClF             | H <sub>2</sub> O  | -13.13                  | 17.42                     | -6.20                   | -1.12                     | -4.60                         | -7.64                   |
| I <sub>2</sub>  | H <sub>2</sub> O  | -12.21                  | 16.44                     | -5.27                   | -0.78                     | -3.10                         | -4.92                   |
| Br <sub>2</sub> | H <sub>2</sub> O  | -9.80                   | 13.07                     | -3.74                   | -0.56                     | -3.67                         | -4.69                   |
| Cl <sub>2</sub> | H <sub>2</sub> O  | -6.97                   | 9.36                      | -2.57                   | -0.32                     | -3.26                         | -3.77                   |
| BrF             | HCN               | -17.04                  | 23.34                     | -9.12                   | -1.57                     | -4.25                         | -8.63                   |
| ClF             | HCN               | -10.07                  | 13.02                     | -4.46                   | -0.70                     | -3.70                         | -5.90                   |
| I <sub>2</sub>  | HCN               | -9.34                   | 13.18                     | -4.49                   | -0.51                     | -3.85                         | -5.00                   |
| Br <sub>2</sub> | HCN               | -7.24                   | 9.76                      | -2.78                   | -0.25                     | -3.36                         | -3.87                   |
| Cl <sub>2</sub> | HCN               | -5.11                   | 6.80                      | -1.76                   | -0.09                     | -2.71                         | -2.86                   |

Table S11. GKS-EDA results for XB dimers in solution ( $\epsilon=78.36$ ) based on M06-2X/ACCD. (kcal/mol)

| XB donor        | XB acceptor       | $\Delta G^{\text{ele}}$ | $\Delta G^{\text{Pauli}}$ | $\Delta G^{\text{pol}}$ | $\Delta G^{\text{desol}}$ | $\Delta G^{\text{corr+disp}}$ | $\Delta G^{\text{int}}$ |
|-----------------|-------------------|-------------------------|---------------------------|-------------------------|---------------------------|-------------------------------|-------------------------|
| BrF             | pyridine          | -83.44                  | 135.10                    | -63.89                  | -10.88                    | -11.39                        | -34.50                  |
| ClF             | pyridine          | -97.72                  | 181.30                    | -99.27                  | -14.48                    | -11.37                        | -41.54                  |
| I <sub>2</sub>  | pyridine          | -51.77                  | 90.33                     | -37.81                  | -5.86                     | -12.10                        | -17.21                  |
| Br <sub>2</sub> | pyridine          | -80.08                  | 142.84                    | -61.79                  | -10.18                    | -15.02                        | -24.22                  |
| Cl <sub>2</sub> | pyridine          | -142.90                 | 286.11                    | -170.96                 | -25.77                    | -1.63                         | -55.15                  |
| BrF             | NH <sub>3</sub>   | -78.26                  | 123.11                    | -54.92                  | -10.94                    | -8.40                         | -29.42                  |
| ClF             | NH <sub>3</sub>   | -81.83                  | 148.33                    | -76.37                  | -15.64                    | -9.46                         | -34.97                  |
| I <sub>2</sub>  | NH <sub>3</sub>   | -51.08                  | 87.22                     | -35.35                  | -8.60                     | -10.14                        | -17.96                  |
| Br <sub>2</sub> | NH <sub>3</sub>   | -71.02                  | 124.03                    | -50.44                  | -12.08                    | -11.76                        | -21.28                  |
| Cl <sub>2</sub> | NH <sub>3</sub>   | -88.87                  | 174.05                    | -86.75                  | -17.34                    | -9.44                         | -28.34                  |
| BrF             | H <sub>2</sub> S  | -37.61                  | 70.14                     | -31.51                  | -6.92                     | -11.32                        | -17.24                  |
| ClF             | H <sub>2</sub> S  | -33.03                  | 67.97                     | -30.80                  | -5.59                     | -12.48                        | -13.94                  |
| I <sub>2</sub>  | H <sub>2</sub> S  | -14.17                  | 26.53                     | -9.79                   | -1.49                     | -7.60                         | -6.53                   |
| Br <sub>2</sub> | H <sub>2</sub> S  | -15.31                  | 28.24                     | -8.84                   | -1.53                     | -8.87                         | -6.31                   |
| Cl <sub>2</sub> | H <sub>2</sub> S  | -7.39                   | 13.34                     | -3.92                   | -0.49                     | -5.52                         | -3.98                   |
| BrF             | Me <sub>2</sub> O | -34.76                  | 52.63                     | -20.59                  | -3.52                     | -8.15                         | -14.38                  |
| ClF             | Me <sub>2</sub> O | -23.55                  | 37.21                     | -13.70                  | -2.01                     | -8.61                         | -10.67                  |
| I <sub>2</sub>  | Me <sub>2</sub> O | -18.02                  | 27.25                     | -8.71                   | -0.88                     | -9.76                         | -10.14                  |
| Br <sub>2</sub> | Me <sub>2</sub> O | -14.84                  | 22.22                     | -6.20                   | -0.48                     | -7.02                         | -6.32                   |
| Cl <sub>2</sub> | Me <sub>2</sub> O | -9.56                   | 14.35                     | -3.65                   | -0.18                     | -6.45                         | -5.49                   |
| BrF             | H <sub>2</sub> O  | -22.12                  | 30.17                     | -11.37                  | -2.73                     | -3.76                         | -9.80                   |
| ClF             | H <sub>2</sub> O  | -13.86                  | 18.67                     | -6.52                   | -1.40                     | -4.77                         | -7.88                   |
| I <sub>2</sub>  | H <sub>2</sub> O  | -12.79                  | 17.49                     | -5.53                   | -0.98                     | -3.21                         | -5.02                   |
| Br <sub>2</sub> | H <sub>2</sub> O  | -10.13                  | 13.65                     | -3.85                   | -0.68                     | -3.77                         | -4.78                   |
| Cl <sub>2</sub> | H <sub>2</sub> O  | -7.11                   | 9.59                      | -2.59                   | -0.38                     | -3.33                         | -3.82                   |
| BrF             | HCN               | -18.80                  | 26.38                     | -10.01                  | -2.03                     | -4.51                         | -8.98                   |
| ClF             | HCN               | -10.56                  | 13.71                     | -4.52                   | -0.86                     | -3.82                         | -6.05                   |
| I <sub>2</sub>  | HCN               | -9.69                   | 13.76                     | -4.60                   | -0.61                     | -3.94                         | -5.08                   |
| Br <sub>2</sub> | HCN               | -7.45                   | 10.05                     | -2.78                   | -0.31                     | -3.43                         | -3.92                   |
| Cl <sub>2</sub> | HCN               | -5.24                   | 6.95                      | -1.72                   | -0.11                     | -2.75                         | -2.87                   |

Table S12. The weights of the attractive interactions in benzene, ethylphenyl ether and dibromomethane.

|        | XB donor        | XB acceptor       | $\epsilon=2.27$  |                  |                    |                        |                                               | $\epsilon=4.18$  |                  |                    |                        |                                               | $\epsilon=7.22$  |                  |                    |                        |                                               |
|--------|-----------------|-------------------|------------------|------------------|--------------------|------------------------|-----------------------------------------------|------------------|------------------|--------------------|------------------------|-----------------------------------------------|------------------|------------------|--------------------|------------------------|-----------------------------------------------|
|        |                 |                   | W <sub>pol</sub> | W <sub>ele</sub> | W <sub>desol</sub> | W <sub>disp/corr</sub> | $\Delta G^{\text{int}}/\Delta E^{\text{int}}$ | W <sub>pol</sub> | W <sub>ele</sub> | W <sub>desol</sub> | W <sub>disp/corr</sub> | $\Delta G^{\text{int}}/\Delta E^{\text{int}}$ | W <sub>pol</sub> | W <sub>ele</sub> | W <sub>desol</sub> | W <sub>disp/corr</sub> | $\Delta G^{\text{int}}/\Delta E^{\text{int}}$ |
| Type A | ClF             | pyridine          | 41%              | 46%              | 3%                 | 10%                    | 158%                                          | 42%              | 45%              | 5%                 | 9%                     | 198%                                          | 43%              | 44%              | 6%                 | 7%                     | 233%                                          |
|        | ClF             | NH <sub>3</sub>   | 37%              | 47%              | 5%                 | 11%                    | 153%                                          | 38%              | 46%              | 6%                 | 9%                     | 195%                                          | 39%              | 45%              | 8%                 | 8%                     | 227%                                          |
|        | ClF             | H <sub>2</sub> S  | 32%              | 42%              | 3%                 | 22%                    | 135%                                          | 35%              | 41%              | 5%                 | 19%                    | 182%                                          | 35%              | 40%              | 6%                 | 19%                    | 196%                                          |
|        | BrF             | pyridine          | 36%              | 51%              | 3%                 | 9%                     | 133%                                          | 36%              | 50%              | 5%                 | 9%                     | 153%                                          | 36%              | 50%              | 6%                 | 8%                     | 168%                                          |
|        | BrF             | NH <sub>3</sub>   | 35%              | 53%              | 4%                 | 8%                     | 133%                                          | 34%              | 52%              | 5%                 | 8%                     | 151%                                          | 34%              | 52%              | 6%                 | 7%                     | 166%                                          |
|        | BrF             | H <sub>2</sub> S  | 34%              | 45%              | 4%                 | 17%                    | 133%                                          | 34%              | 44%              | 6%                 | 16%                    | 154%                                          | 34%              | 44%              | 7%                 | 15%                    | 170%                                          |
|        | Cl <sub>2</sub> | NH <sub>3</sub>   | 26%              | 50%              | 4%                 | 21%                    | 131%                                          | 27%              | 49%              | 5%                 | 19%                    | 159%                                          | 29%              | 47%              | 6%                 | 17%                    | 196%                                          |
|        | Cl <sub>2</sub> | pyridine          | 28%              | 48%              | 2%                 | 21%                    | 131%                                          | 31%              | 47%              | 4%                 | 19%                    | 169%                                          | 45%              | 43%              | 6%                 | 6%                     | 560%                                          |
|        | Br <sub>2</sub> | NH <sub>3</sub>   | 28%              | 53%              | 4%                 | 15%                    | 131%                                          | 30%              | 51%              | 6%                 | 13%                    | 164%                                          | 29%              | 51%              | 7%                 | 13%                    | 177%                                          |
|        | Br <sub>2</sub> | pyridine          | 30%              | 51%              | 3%                 | 16%                    | 129%                                          | 31%              | 54%              | 4%                 | 14%                    | 154%                                          | 32%              | 50%              | 5%                 | 13%                    | 179%                                          |
|        | I <sub>2</sub>  | NH <sub>3</sub>   | 30%              | 51%              | 4%                 | 15%                    | 122%                                          | 30%              | 50%              | 6%                 | 14%                    | 136%                                          | 30%              | 50%              | 7%                 | 13%                    | 146%                                          |
|        | BrF             | H <sub>2</sub> O  | 26%              | 56%              | 4%                 | 14%                    | 121%                                          | 26%              | 55%              | 6%                 | 14%                    | 131%                                          | 25%              | 55%              | 7%                 | 14%                    | 138%                                          |
|        | ClF             | H <sub>2</sub> O  | 23%              | 52%              | 3%                 | 21%                    | 117%                                          | 22%              | 52%              | 5%                 | 21%                    | 125%                                          | 22%              | 51%              | 5%                 | 21%                    | 130%                                          |
|        | BrF             | Me <sub>2</sub> O | 29%              | 53%              | 3%                 | 15%                    | 119%                                          | 29%              | 52%              | 4%                 | 15%                    | 129%                                          | 29%              | 52%              | 5%                 | 15%                    | 136%                                          |
|        | ClF             | Me <sub>2</sub> O | 27%              | 49%              | 3%                 | 21%                    | 118%                                          | 27%              | 49%              | 4%                 | 20%                    | 131%                                          | 27%              | 48%              | 4%                 | 20%                    | 135%                                          |
|        | I <sub>2</sub>  | pyridine          | 32%              | 50%              | 2%                 | 15%                    | 117%                                          | 32%              | 50%              | 4%                 | 15%                    | 126%                                          | 32%              | 50%              | 4%                 | 14%                    | 134%                                          |
| BrF    | HCN             | 28%               | 52%              | 3%               | 17%                | 117%                   | 27%                                           | 52%              | 5%               | 16%                | 125%                   | 27%                                           | 52%              | 5%               | 16%                | 130%                   |                                               |
| ClF    | HCN             | 23%               | 52%              | 3%               | 21%                | 113%                   | 22%                                           | 52%              | 4%               | 22%                | 119%                   | 22%                                           | 52%              | 5%               | 22%                | 123%                   |                                               |
| Type B | I <sub>2</sub>  | H <sub>2</sub> S  | 28%              | 45%              | 2%                 | 25%                    | 111%                                          | 28%              | 44%              | 3%                 | 24%                    | 117%                                          | 29%              | 44%              | 3%                 | 24%                    | 121%                                          |
|        | Br <sub>2</sub> | H <sub>2</sub> S  | 25%              | 46%              | 2%                 | 27%                    | 113%                                          | 25%              | 46%              | 3%                 | 26%                    | 119%                                          | 25%              | 45%              | 3%                 | 26%                    | 122%                                          |
|        | Cl <sub>2</sub> | H <sub>2</sub> S  | 22%              | 45%              | 2%                 | 31%                    | 112%                                          | 22%              | 44%              | 2%                 | 31%                    | 117%                                          | 22%              | 44%              | 3%                 | 31%                    | 120%                                          |
|        | I <sub>2</sub>  | H <sub>2</sub> O  | 23%              | 63%              | 3%                 | 11%                    | 113%                                          | 22%              | 62%              | 4%                 | 12%                    | 119%                                          | 22%              | 62%              | 4%                 | 12%                    | 123%                                          |
|        | Br <sub>2</sub> | H <sub>2</sub> O  | 19%              | 59%              | 2%                 | 20%                    | 111%                                          | 18%              | 58%              | 3%                 | 20%                    | 115%                                          | 18%              | 58%              | 4%                 | 20%                    | 118%                                          |
|        | Cl <sub>2</sub> | H <sub>2</sub> O  | 17%              | 57%              | 2%                 | 24%                    | 109%                                          | 16%              | 56%              | 3%                 | 25%                    | 112%                                          | 16%              | 56%              | 3%                 | 25%                    | 114%                                          |
|        | I <sub>2</sub>  | Me <sub>2</sub> O | 21%              | 48%              | 1%                 | 30%                    | 105%                                          | 21%              | 48%              | 2%                 | 29%                    | 107%                                          | 21%              | 48%              | 2%                 | 28%                    | 108%                                          |
|        | Br <sub>2</sub> | Me <sub>2</sub> O | 21%              | 54%              | 1%                 | 24%                    | 106%                                          | 21%              | 54%              | 2%                 | 24%                    | 109%                                          | 20%              | 53%              | 2%                 | 24%                    | 111%                                          |
|        | Cl <sub>2</sub> | Me <sub>2</sub> O | 17%              | 50%              | 1%                 | 32%                    | 106%                                          | 17%              | 50%              | 1%                 | 32%                    | 109%                                          | 17%              | 50%              | 2%                 | 32%                    | 110%                                          |

|  |                 |     |     |     |    |     |      |     |     |    |     |      |     |     |    |     |      |
|--|-----------------|-----|-----|-----|----|-----|------|-----|-----|----|-----|------|-----|-----|----|-----|------|
|  | I <sub>2</sub>  | HCN | 23% | 53% | 2% | 22% | 106% | 22% | 53% | 3% | 22% | 109% | 22% | 53% | 3% | 22% | 110% |
|  | Br <sub>2</sub> | HCN | 19% | 54% | 1% | 25% | 105% | 18% | 55% | 2% | 25% | 107% | 18% | 55% | 2% | 25% | 108% |
|  | Cl <sub>2</sub> | HCN | 18% | 55% | 1% | 27% | 102% | 16% | 56% | 1% | 27% | 103% | 16% | 56% | 1% | 27% | 103% |
